# Supplementary material
Source: publisher figshare collection journal article supplement (https://acs.figshare.com/ndownloader/files/3721315)
Supplement: Supplementary file 1 [file 3721315]

# The Superior Performance of Sol-Gel Made Ce-O-P Catalyst for Selective Catalytic Reduction of NO with NH<sub>3</sub>

Weiyuan Yao,<sup>1†</sup> Yue Liu,<sup>\*1†</sup> Xiaoqiang Wang,<sup>1†</sup> Xiaole Weng,<sup>1†</sup> Haiqiang Wang,<sup>1†</sup> and Zhongbiao Wu<sup>1†,2‡</sup>

<sup>1†</sup>Department of Environmental Engineering, Zhejiang University, 866 Yuhangtang Road, Hangzhou, 310058, P. R. China

<sup>2‡</sup>Zhejiang Provincial Engineering Research Center of Industrial Boiler & Furnace Flue Gas Pollution Control, 866 Yuhangtang Road, Hangzhou, 310058, P. R. China

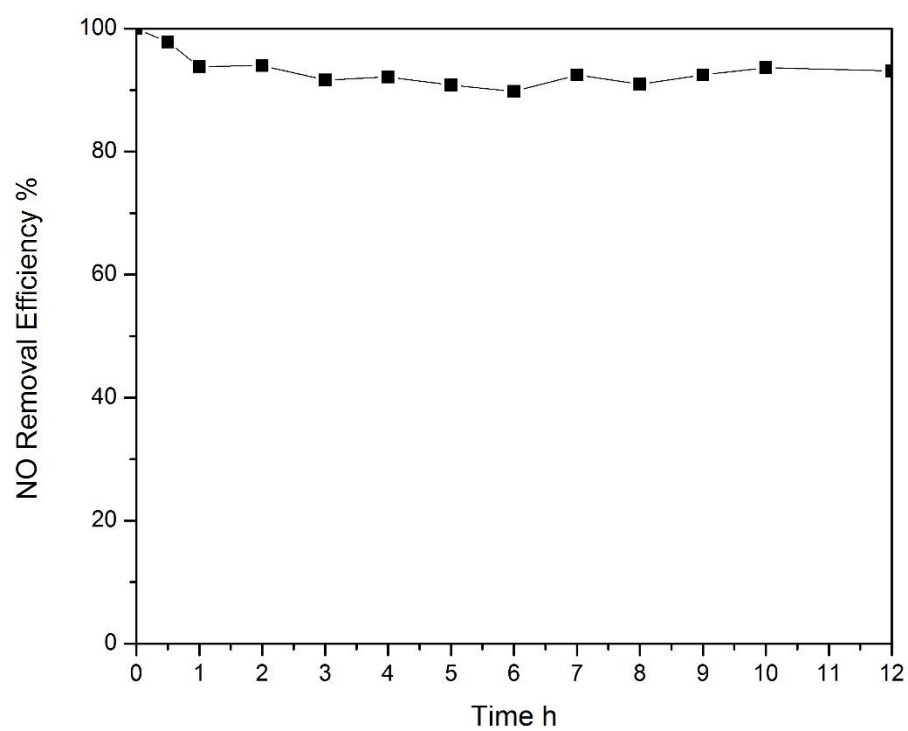

Figure S1. H<sub>2</sub>O duration of Ce–O–P–SG catalyst in SCR process. ([NH<sub>3</sub>] = [NO] = 600 ppm, [O<sub>2</sub>] = 3 %, [H<sub>2</sub>O] = 5 vol %, N<sub>2</sub> balance, GHSV = 40000 h<sup>-1</sup>)

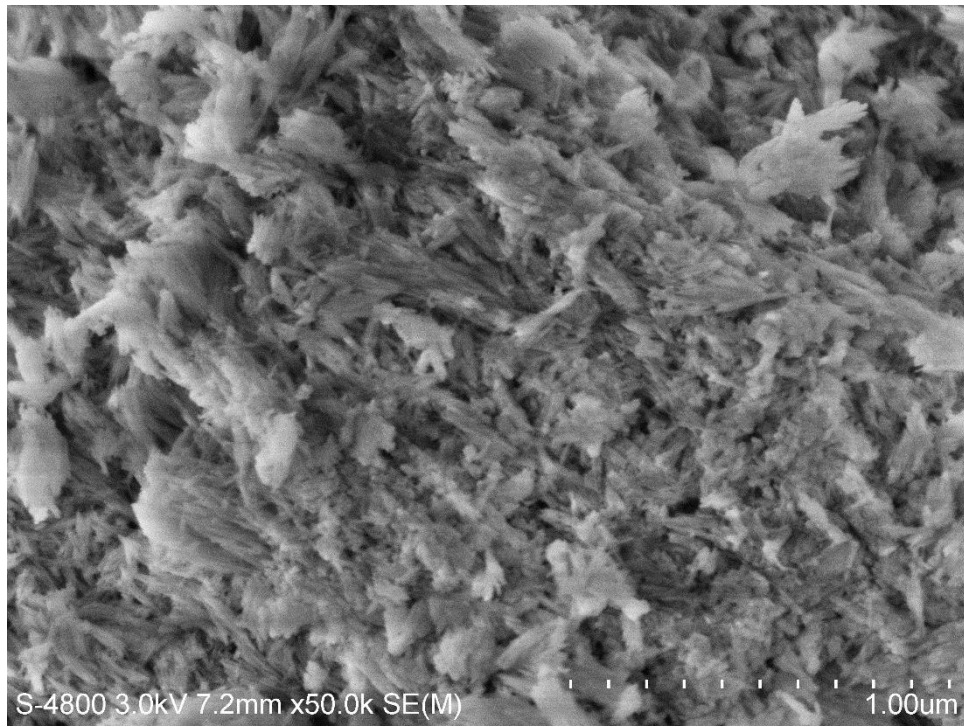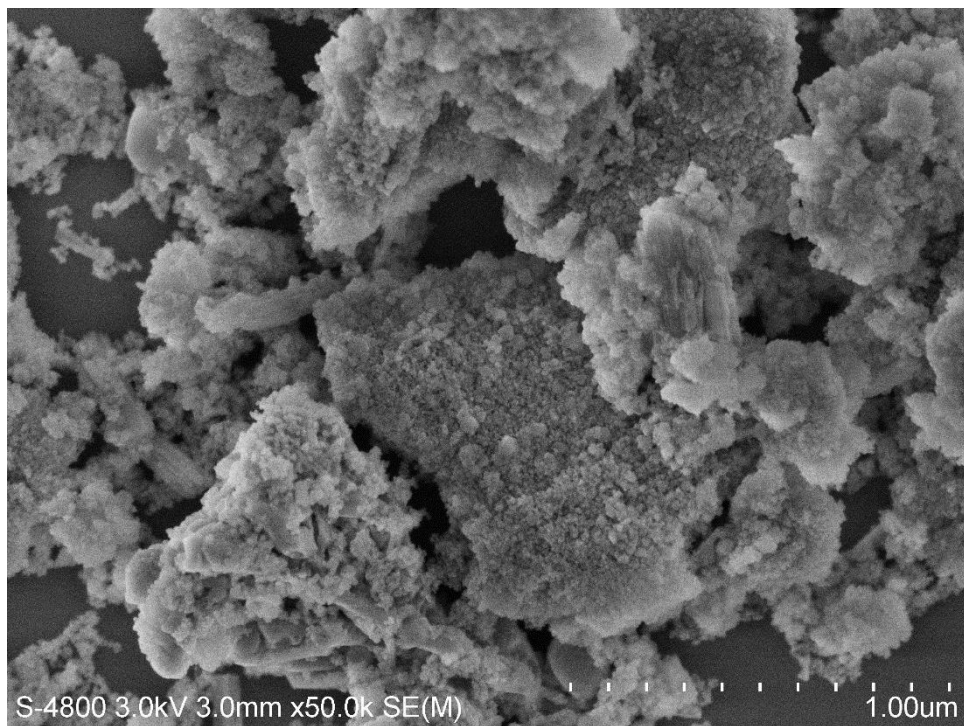

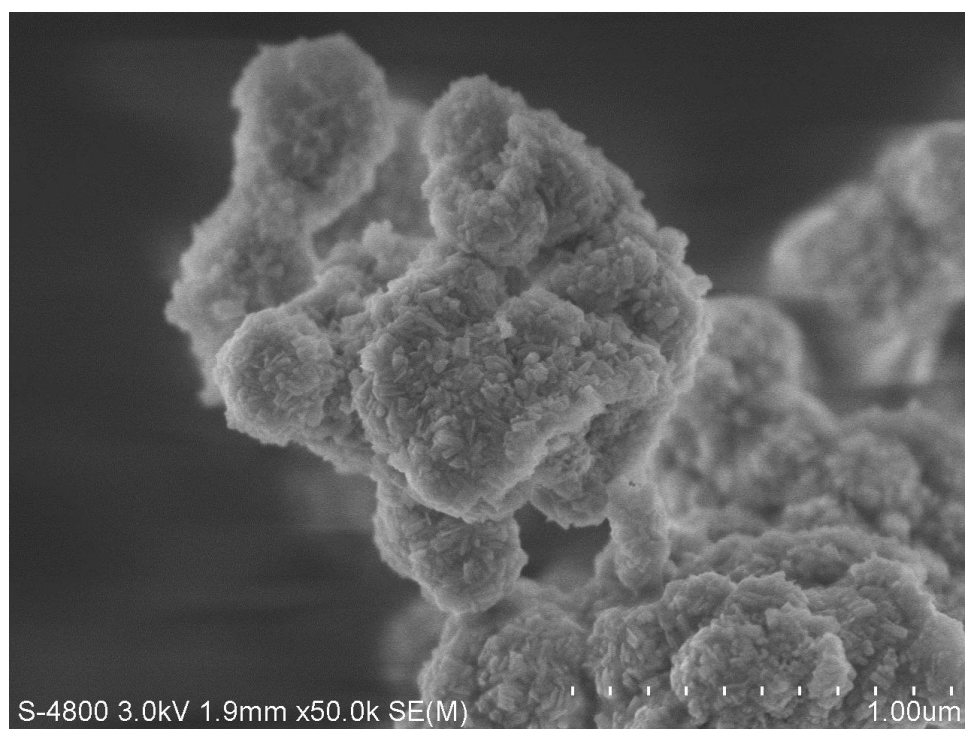

Figure S2. SEM results of the Ce–O–P catalysts: (a) Ce–O–P-SG, (b) Ce–O–P-HT, (c) Ce–O–P-CP.

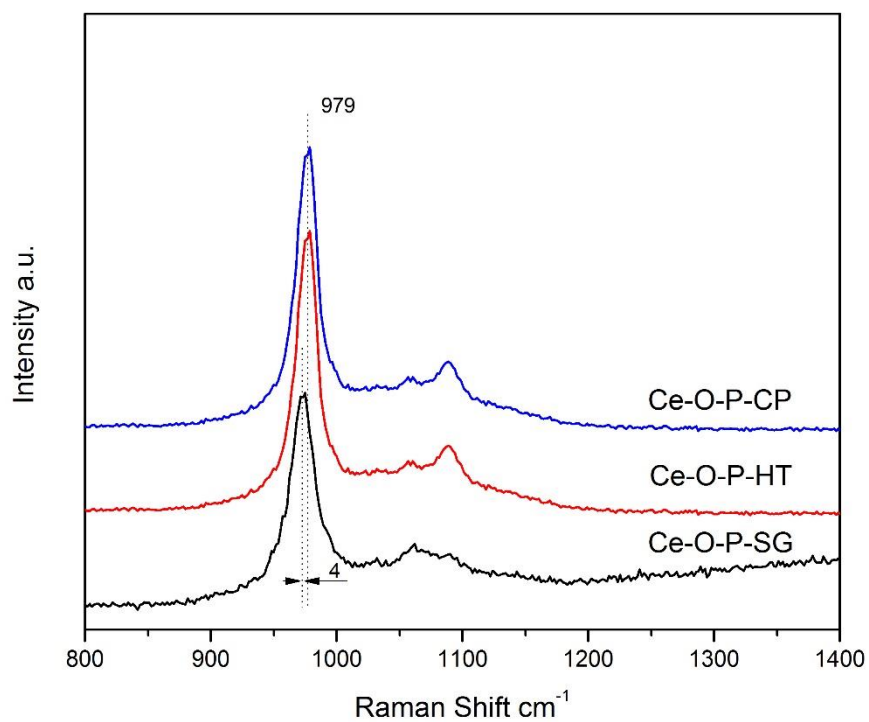

Figure S3. Raman spectra ( $\lambda = 514$  nm) of Ce-O-P-SG, Ce-O-P-HT and Ce-O-P-CP catalysts.

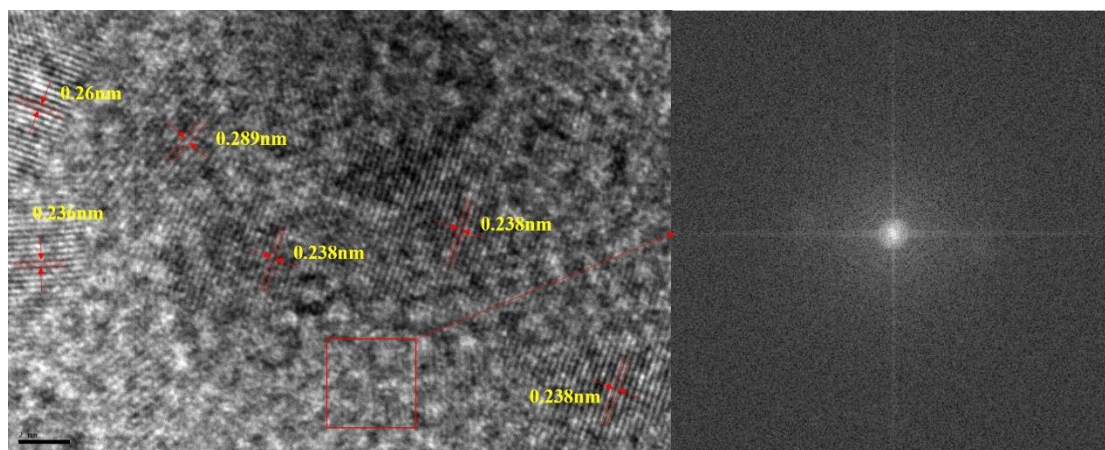

Figure S4. HR-TEM image of Ce-O-P-SG catalyst, the image in right is the FFT pattern of region in red square and reveals no crystal in the region.

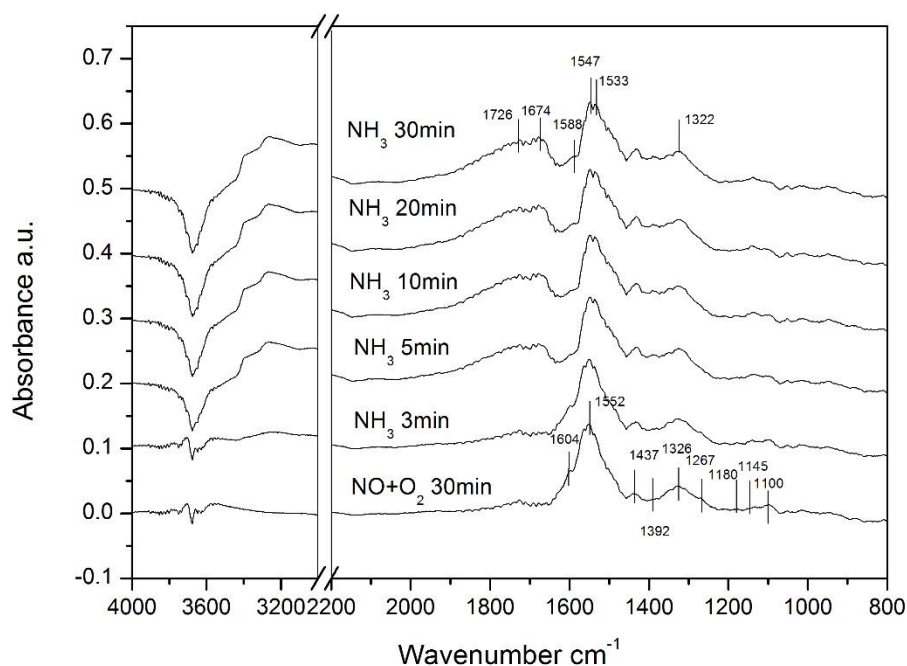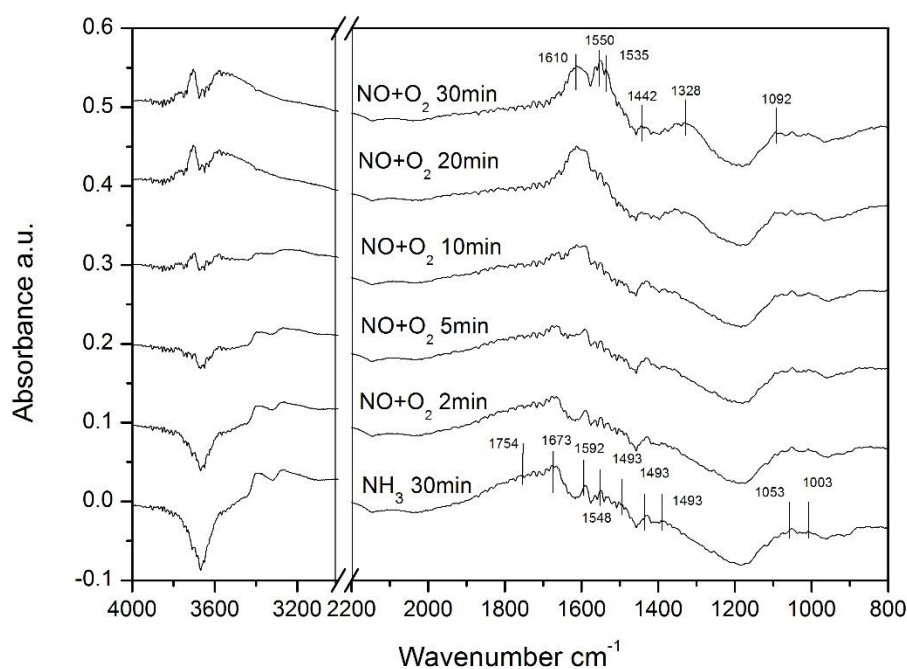

Figure S5. (a) DRIFT spectra taken at 250 °C upon passing 1000 ppm of  $\text{NH}_3 + 3\%$   $\text{O}_2/\text{He}$  over the  $\text{NO} + \text{O}_2$  pre-sorbed on Ce–O–P–SG catalyst at different time; (b) DRIFT spectra taken at 250 °C upon passing 1000 ppm of  $\text{NO}_2 + 3\%$   $\text{O}_2/\text{He}$  over the  $\text{NH}_3$  pre-sorbed on Ce–O–P–SG catalyst at different time.

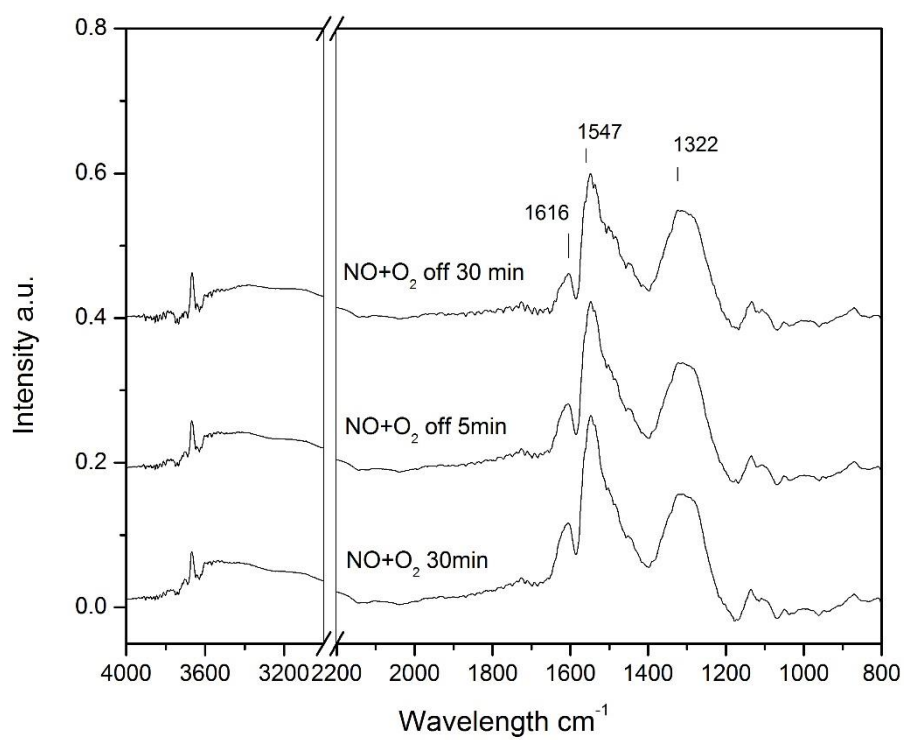

Figure S6. DRIFT spectra taken at 250 °C upon passing pure He over 1000 ppm of NO + 3 % O<sub>2</sub> pre-sorbed on Ce–O–P-SG catalyst at different time.



**Table S1** Bulk atomic concentration of the Ce-O-P catalysts.

| <b>Catalysts</b> | <b>Ce %</b> | <b>P %</b> | <b>Ce/P</b> | <b>O %</b> |
|------------------|-------------|------------|-------------|------------|
| Ce-O-P-SG        | 16.7        | 18.7       | 0.89        | 64.6       |
| Ce-O-P-HT        | 17.5        | 19.6       | 0.89        | 63.0       |
| Ce-O-P-CP        | 19.2        | 21.7       | 0.88        | 59.1       |

**Table S2** S deposition on the Ce-O-P catalysts which were pretreated in SCR process

at the presence of 100 ppm SO<sub>2</sub> and 5 vol. % H<sub>2</sub>O for 10 h

| Catalysts | EDX % | XPS % |
|-----------|-------|-------|
| Ce-O-P-SG | 1.56  | 1.37  |
| Ce-O-P-HT | 0.65  | 0.87  |
| Ce-O-P-CP | 0.59  | 0.58  |
